# Supplementary material
Source: Springer Nature journal article supplement (https://www.springermedizin.de/resource/supplementary/12879_2011_1692_MOESM1_ESM.pdf/9443370)

**A)****CURB-65**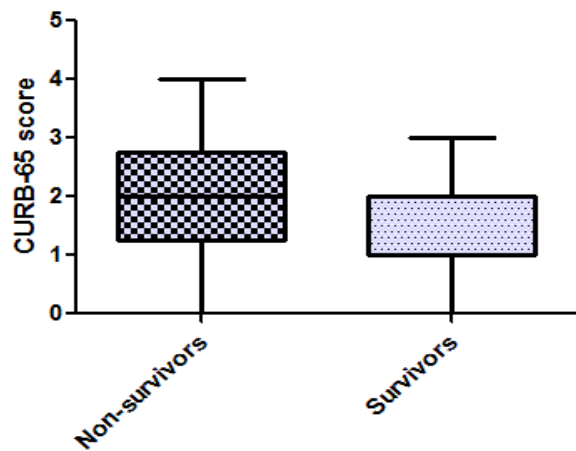**B)****SOFA**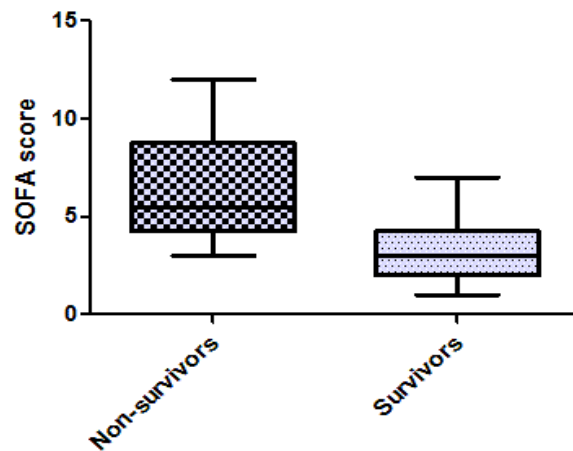**C)****sRAGE**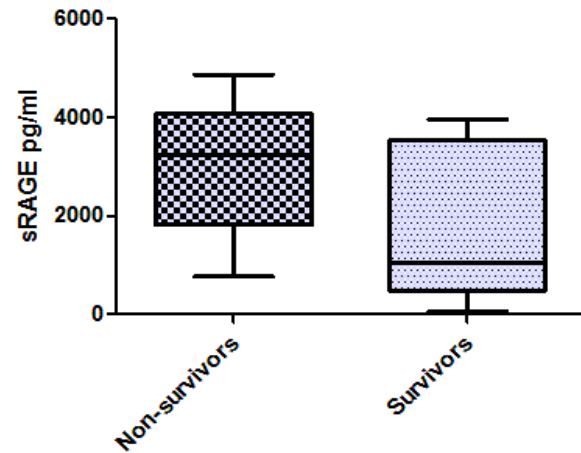**D)****RAGE receptor**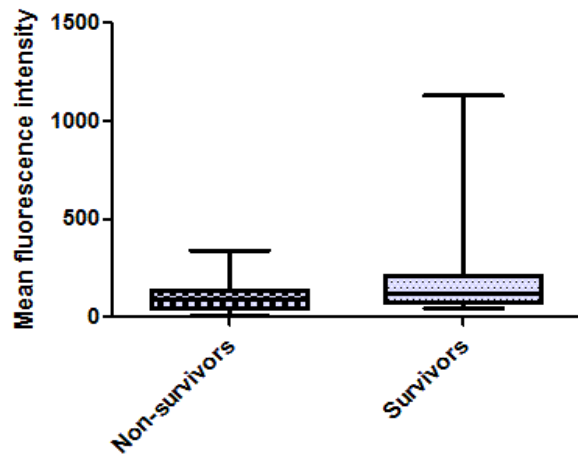**E)****HMGB-1**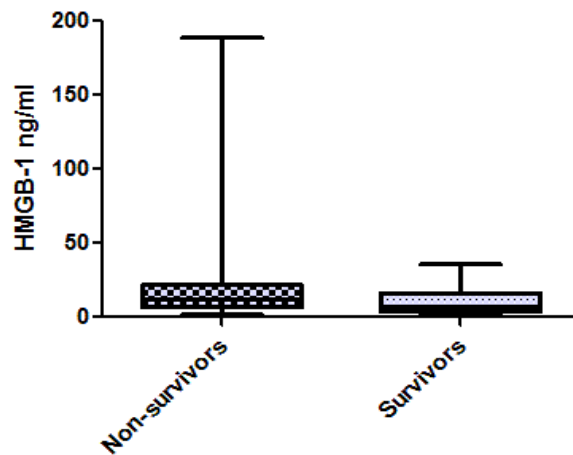

Supplement: MOESM1 [file 9443370]
